# Supplementary material for: Use of silver triangular nanoparticles for the colorimetric determination of ammonium persulfate concentration in water-borne adhesives for cigarettes
Source: Royal Society of Chemistry journal article supplement (doi:10.1039/c5ay02707a), 2015-12-21
Supplement: c5ay02707a1.pdf [file c5ay02707a1.pdf]

**Figure caption:**

**Figure S1.** Absorption spectra and pictures of colorful silver nanoparticles.

**Figure S2.** UV-vis absorption features of red silver nanoparticles in the presence of different concentrations of  $(\text{NH}_4)_2\text{S}_2\text{O}_8$  and their corresponding absorption variation trend

**Figure S3.** UV-vis absorption features of purple silver nanoparticles in the presence of different concentrations of  $(\text{NH}_4)_2\text{S}_2\text{O}_8$  and their corresponding absorption variation trend

**Figure S4.** UV-vis absorption features of blue silver nanoparticles in the presence of different concentrations of  $(\text{NH}_4)_2\text{S}_2\text{O}_8$  and their corresponding absorption variation trend

**Figure S5.** Absorption spectra of silver TNPs before(A) and after(B) reaction with  $(\text{NH}_4)_2\text{S}_2\text{O}_8$  at different pH.

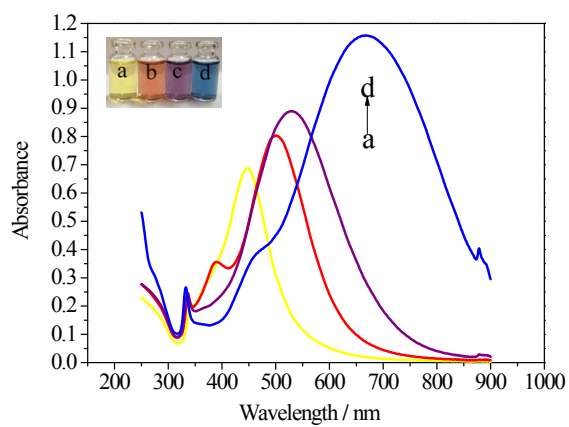

**Figure S1.** Absorption spectra and pictures of colorful silver nanoparticles. Yellow (a), red (b), purple (c) and blue (d) silver nanoparticles were synthesized by adding 35, 50, 80 and 100  $\mu\text{L}$  of 100  $\text{mmol L}^{-1}$  sodium borohydride respectively

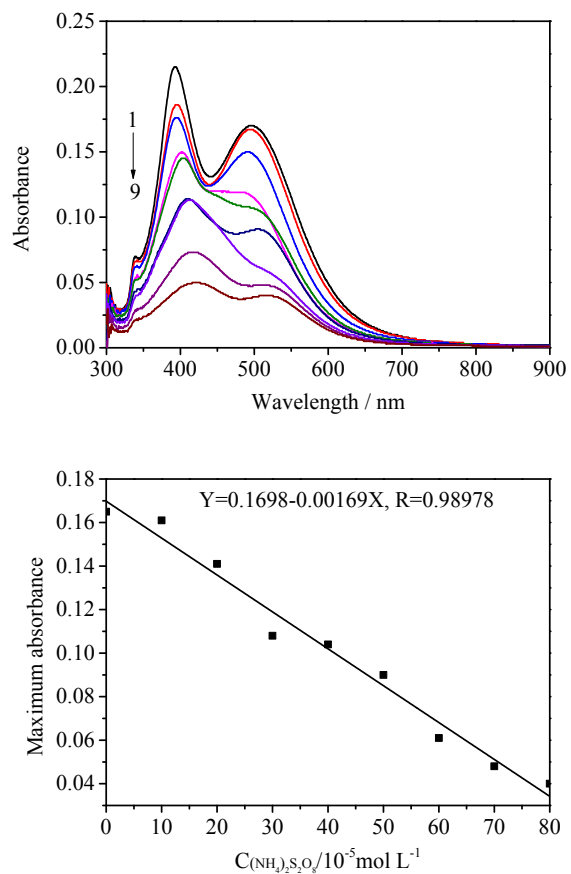

**Figure S2.** UV-vis absorption features of red silver nanoparticles in the presence of different concentrations of  $(\text{NH}_4)_2\text{S}_2\text{O}_8$  and their corresponding absorption variation trend; pH 6.80, reaction for 30 min at 80 °C

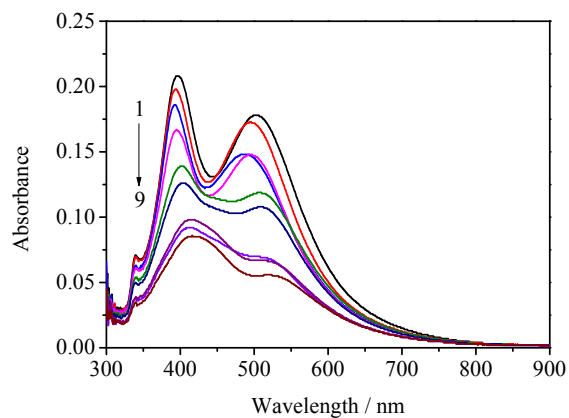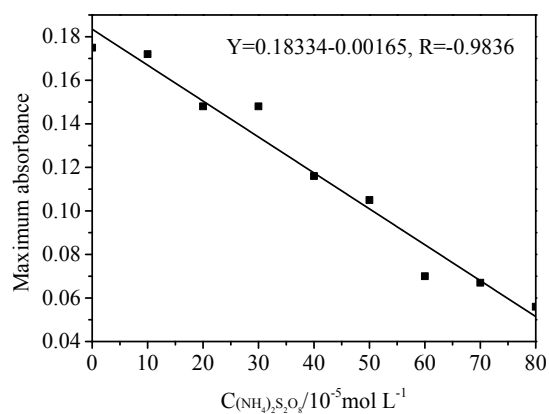

**Figure S3.** UV-vis absorption features of purple silver nanoparticles in the presence of different concentrations of  $(\text{NH}_4)_2\text{S}_2\text{O}_8$  and their corresponding absorption variation trend; pH 6.80, reaction for 30 min at 80 °C

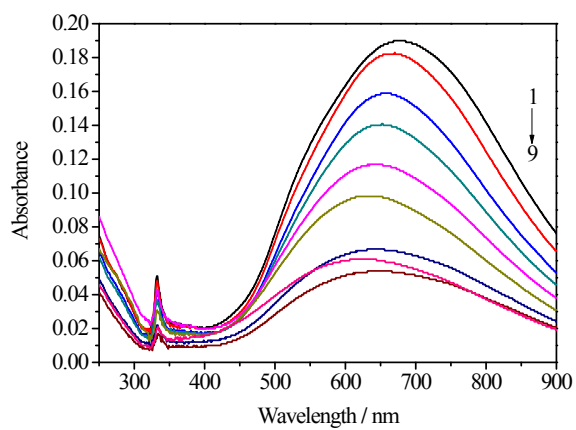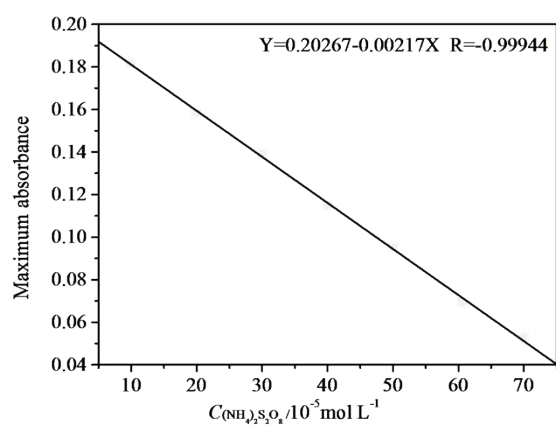

**Figure S4.** UV-vis absorption features of blue silver nanoparticles in the presence of different concentrations of  $(\text{NH}_4)_2\text{S}_2\text{O}_8$  and their corresponding absorption variation trend; pH 6.80, reaction for 30 min at 80 °C

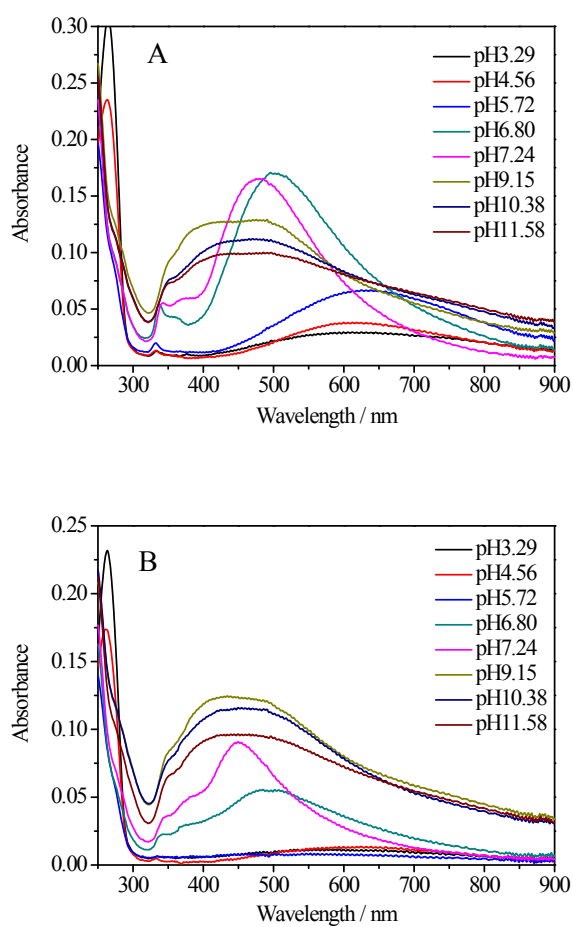

**Figure S5.** Absorption spectra of silver TNPs before(A) and after(B) reaction with  $(\text{NH}_4)_2\text{S}_2\text{O}_8$  at different pH. Condition: concentration of silver TNPs,  $0.286 \times 10^{-6} \text{ mol L}^{-1}$ ;  $(\text{NH}_4)_2\text{S}_2\text{O}_8$ ,  $0.60 \text{ mmol L}^{-1}$ ; B-R buffer,  $0.02 \text{ mol L}^{-1}$

**Table S1.** Detection results of Atomic absorption spectrometry.

| $C_{\text{AgTNP}s}$ | $C_{(\text{NH}_4)_2\text{S}_2\text{O}_8}$<br>(mmol L <sup>-1</sup> ) | ABS    | $C_{\text{AgTNP}s}$ | $C_{(\text{NH}_4)_2\text{S}_2\text{O}_8}$<br>(mmol L <sup>-1</sup> ) | ABS    |
|---------------------|----------------------------------------------------------------------|--------|---------------------|----------------------------------------------------------------------|--------|
| 0.786X M            | 0                                                                    | 0.0048 | 0.786 X M           | 40                                                                   | 0.0218 |
|                     | 10                                                                   | 0.0084 |                     | 50                                                                   | 0.0266 |
|                     | 20                                                                   | 0.0094 |                     | 60                                                                   | 0.0288 |
|                     | 30                                                                   | 0.0184 |                     | 70                                                                   | 0.0328 |

**Table S2.** Detection results from ten batches of silver TNPs.

| Batches <sup>a</sup> | Maximum absorption wavelength (nm) | Added (mmol L <sup>-1</sup> ) | Detected (mmol L <sup>-1</sup> ) | Relative deviation (%) |
|----------------------|------------------------------------|-------------------------------|----------------------------------|------------------------|
| 1                    | 592                                | 0.2                           | 0.1716                           | -14.2                  |
|                      |                                    | 0.6                           | 0.6331                           | 5.5                    |
| 2                    | 549                                | 0.2                           | 0.1857                           | -7.2                   |
|                      |                                    | 0.6                           | 0.5849                           | -2.5                   |
| 3                    | 563                                | 0.2                           | 0.1808                           | -9.6                   |
|                      |                                    | 0.6                           | 0.5817                           | -3.1                   |
| 4                    | 607                                | 0.2                           | 0.2089                           | 4.5                    |
|                      |                                    | 0.6                           | 0.6368                           | 6.1                    |
| 5                    | 584                                | 0.2                           | 0.1909                           | -4.6                   |
|                      |                                    | 0.6                           | 0.6238                           | 4.0                    |

<sup>a</sup>The five batches (1 to 5) of silver TNPs were prepared using same reagent but different days.
